# Supplementary material for: Interaction of the III-As monolayer with SARS-CoV-2 biomarkers: implications for biosensor development
Source: Royal Society of Chemistry journal article supplement (doi:10.1039/d3cp05215j), 2024-01-01
Supplement: d3cp05215j1.pdf [file d3cp05215j1.pdf]

## Supplementary Information for

### “Interaction of III-As Monolayer with SARS-CoV-2 Biomarkers: Implications for Biosensor Development”

Sudipta Saha, Deb Indronil Sajib and Md. Kawsar Alam<sup>1</sup>

Department of Electrical and Electronic Engineering, Bangladesh University of Engineering and Technology,  
Dhaka- 1205, Bangladesh

#### A. Charge Density Difference

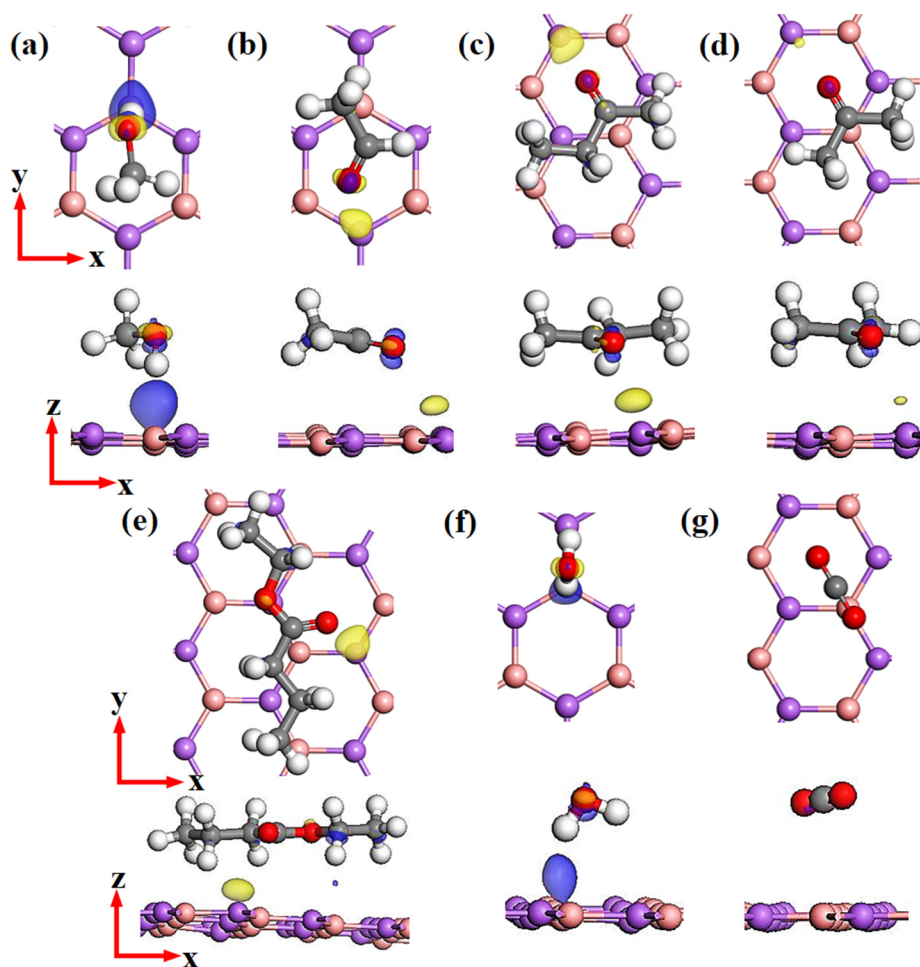

**Figure S1.** Charge density difference of the most optimized structure (top and side view) for (a) Methanol, (b) Ethanal, (c) Butanone, (d) Acetone, (e) Ethyl Butyrate, (f) H<sub>2</sub>O and (g) CO<sub>2</sub> on pristine BAS monolayer. Blue region indicates charge accumulation, and yellow region indicates charge depletion.

<sup>1</sup> Corresponding Author. Email: [kawsaralam@eee.buet.ac.bd](mailto:kawsaralam@eee.buet.ac.bd); [kawsar.alam@alumni.ubc.ca](mailto:kawsar.alam@alumni.ubc.ca)

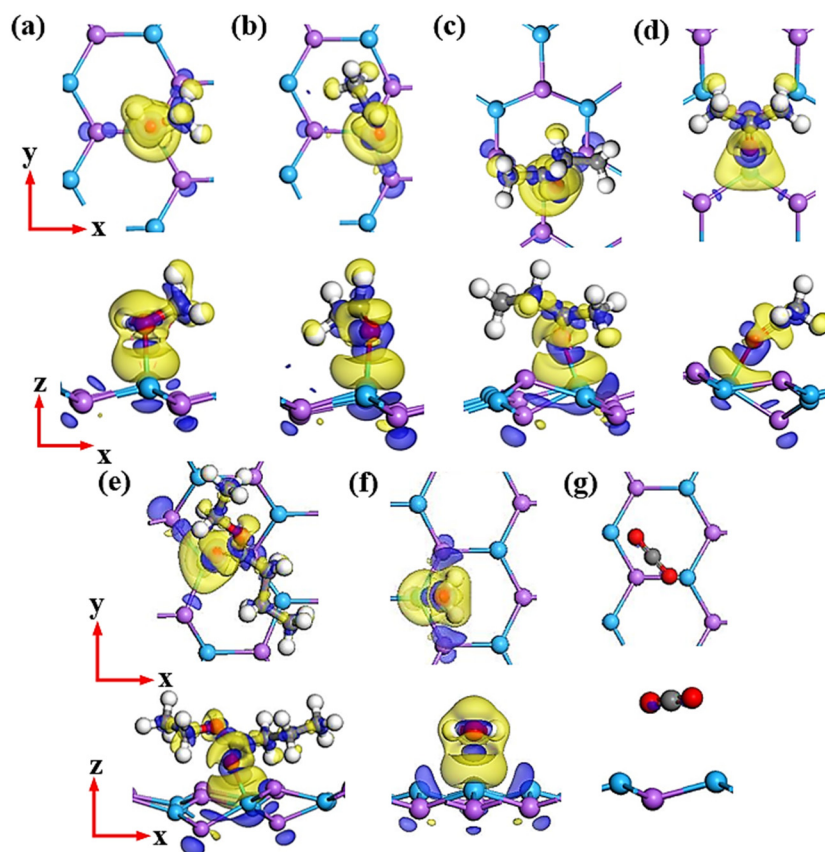

**Figure S2.** Charge density difference of the most optimized structure (top and side view) for (a) Methanol, (b) Ethanal, (c) Butanone, (d) Acetone, (e) Ethyl Butyrate, (f) H<sub>2</sub>O and (g) CO<sub>2</sub> on pristine GaAs monolayer. Blue region indicates charge accumulation, and yellow region indicates charge depletion.

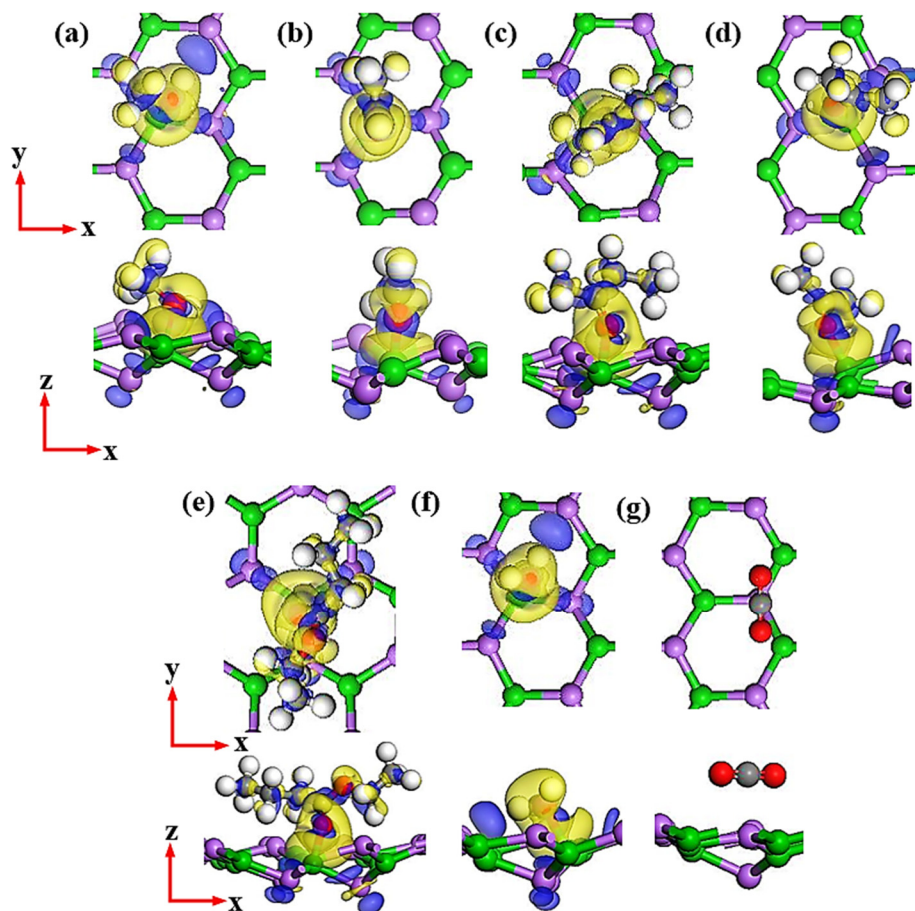

**Figure S3.** Charge density difference of the most optimized structure (top and side view) for (a) Methanol, (b) Ethanal, (c) Butanone, (d) Acetone, (e) Ethyl Butyrate, (f) H<sub>2</sub>O and (g) CO<sub>2</sub> on pristine AIAs monolayer. Blue region indicates charge accumulation, and yellow region indicates charge depletion.

## B. Partial Density of states (PDOS) for III-As Analyte system.

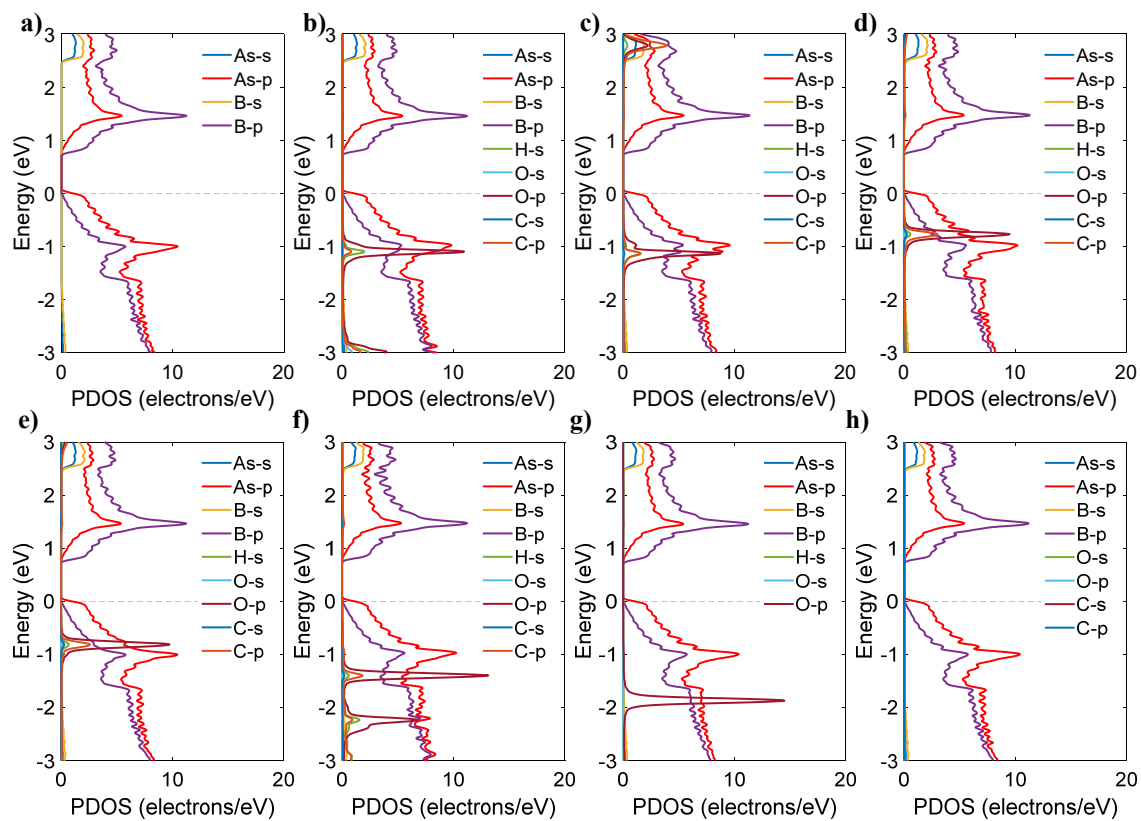

**Figure S4.** PDOS of (a) pristine BAs (b) Methanol (c) Ethanal (d) Butanone (e) Acetone (f) Ethyl Butyrate (g) H<sub>2</sub>O and (h) CO<sub>2</sub> adsorbed structure on BAs.

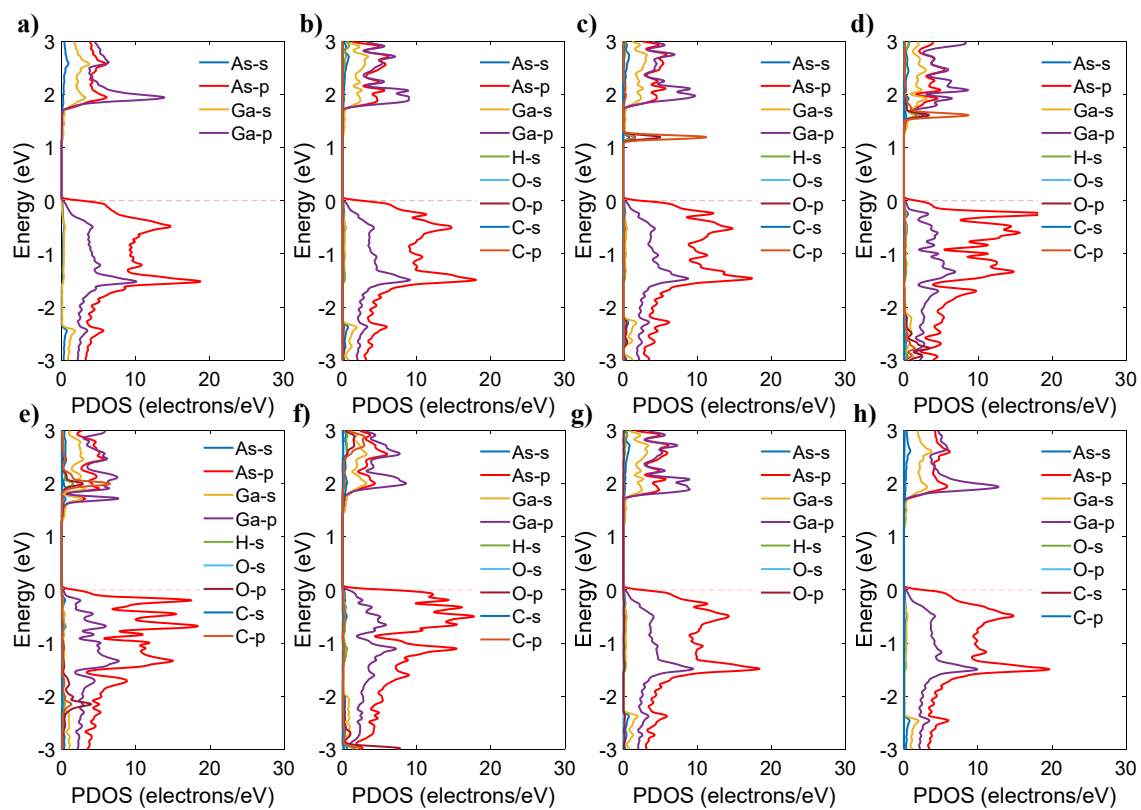

**Figure S5.** PDOS of (a) pristine GaAs (b) Methanol (c) Ethanal (d) Butanone (e) Acetone (f) Ethyl Butyrate (g) H<sub>2</sub>O and (h)CO<sub>2</sub> adsorbed structure on GaAs.

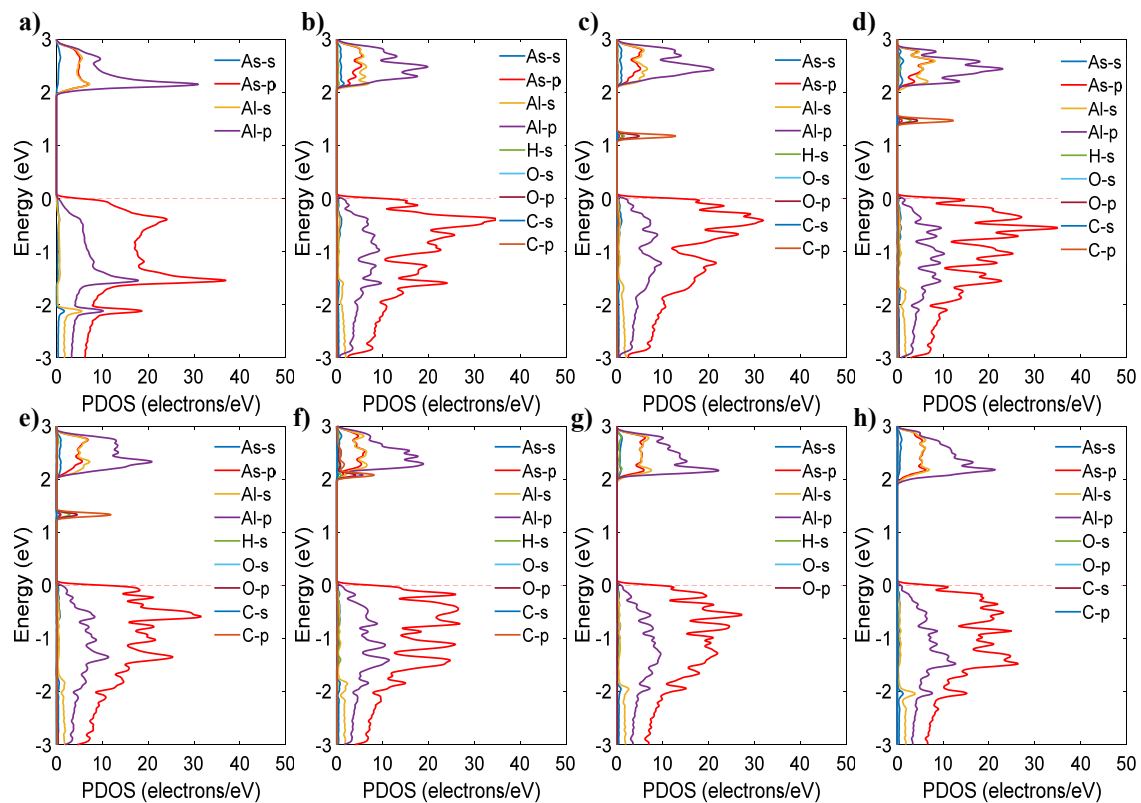

**Figure S6.** PDOS of (a) pristine AlAs (b) Methanol (c) Ethanol (d) Butanone (e) Acetone (f) Ethyl Butyrate (g) H<sub>2</sub>O and (h) CO<sub>2</sub> adsorbed structure on AlAs.

### C. Loss Factor:

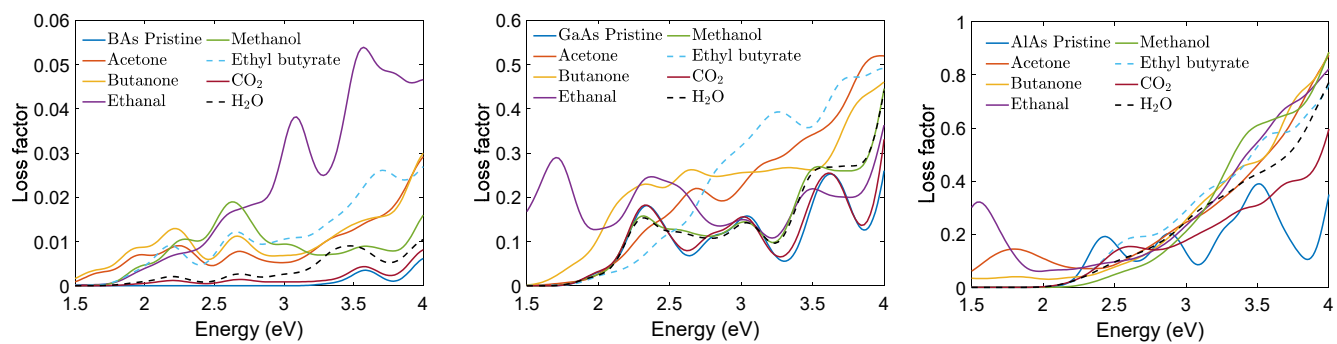

**Figure S7.** Loss factor vs energy for BAAs, GaAs & AlAs analyte system

### D. Phonon Dispersion:

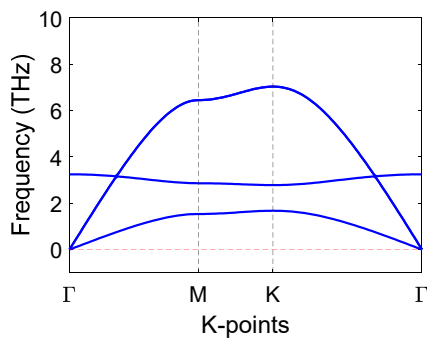

**Figure S8.** Phonon dispersion of AlAs unit cell

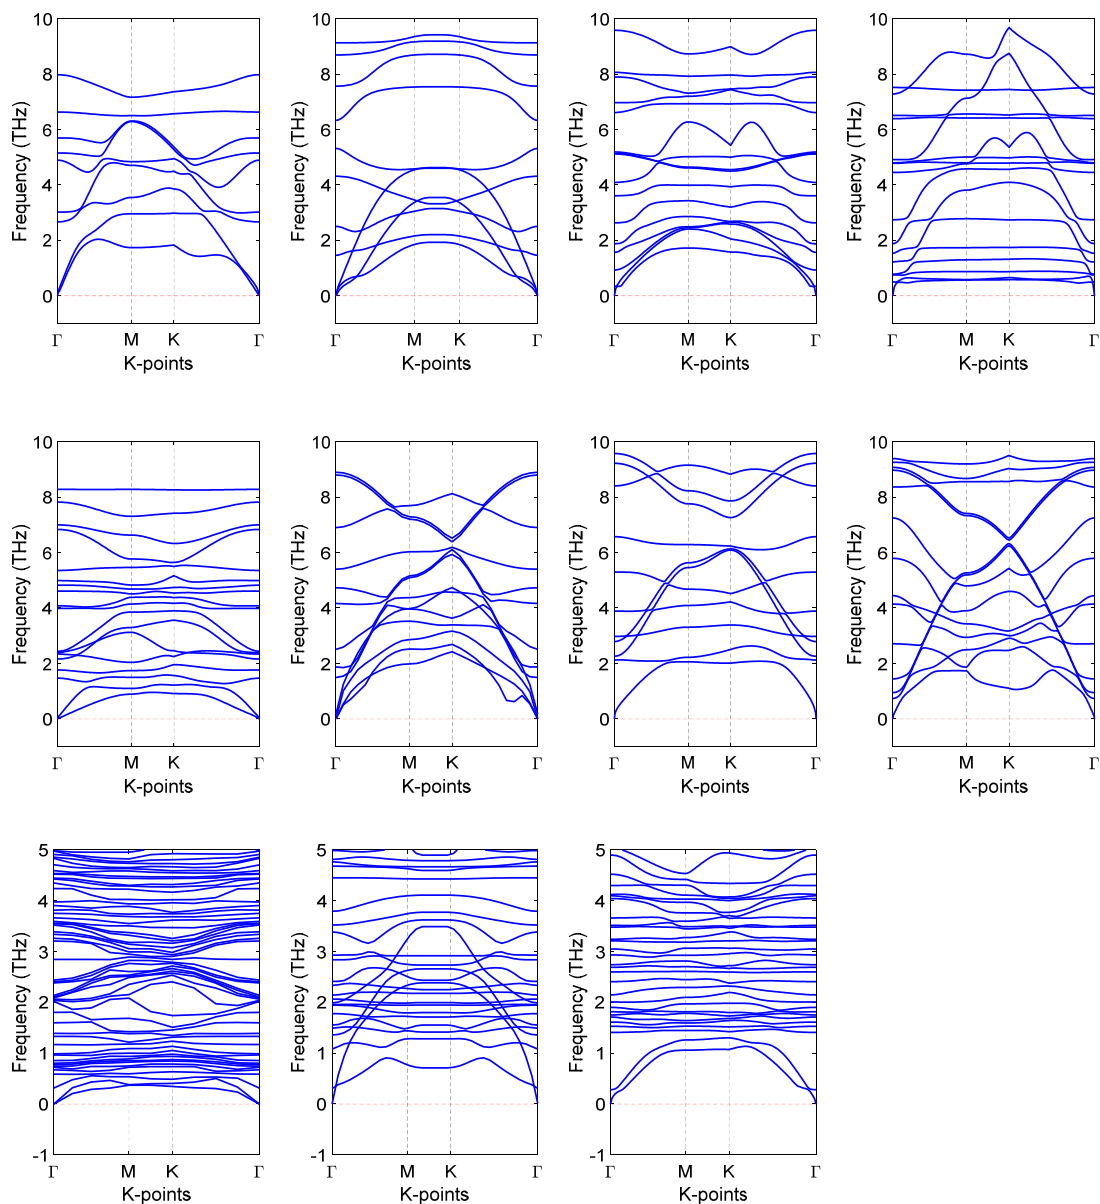

**Figure S9.** Phonon dispersion of (a) methanol on AlAs unit cell, (b) acetone on AlAs unit cell, (c) butanone on AlAs unit cell, (d) ethyl butyrate on AlAs unit cell, (e) H<sub>2</sub>O on AlAs unit cell, (f) ethanal on GaAs unit cell, (g) acetone on GaAs unit cell (h) butanone on GaAs unit cell, (i) ethanal on AlAs 4×4 cell, (j) methanol on GaAs 4×4 cell and (k) ethyl butyrate on GaAs 4×4 cell
